# Supplementary material
Source: PubMed Central journal article supplement (PMC3967518)
Supplement: NIHMS562721-supplement-1.pdf [file NIHMS562721-supplement-1.pdf]

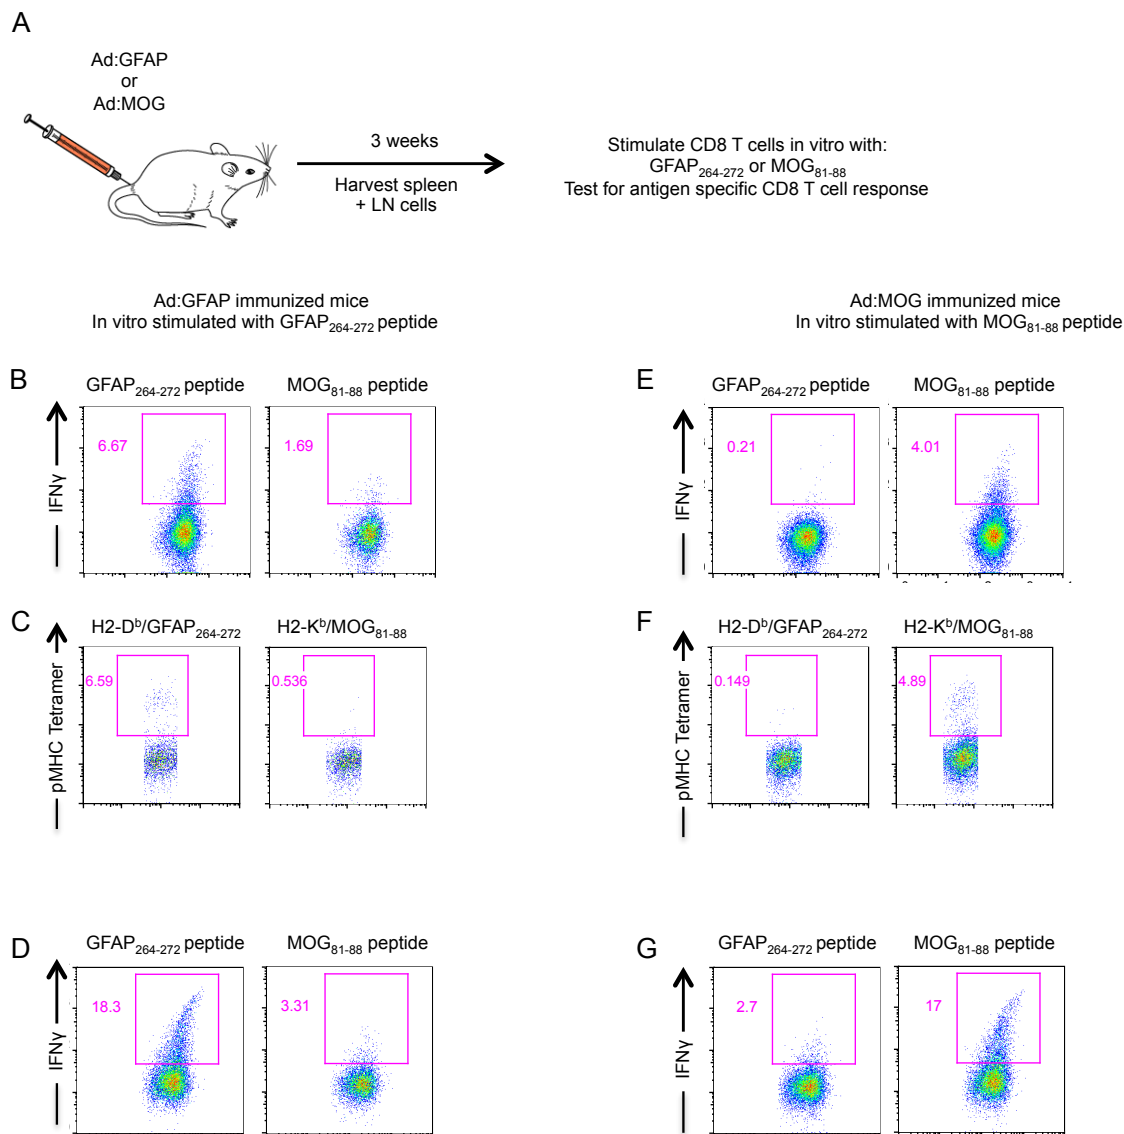

**FIGURE S1.** Isolation of CNS protein-reactive CD8 T cells from C57BL/6 mice. **(A)** Schematic of immunization protocol. C57BL/6 mice were infected with rAd expressing different CNS antigens. **(B)** CD8 T cells isolated from C57BL/6 mice infected with rAd-GFAP produce IFN $\gamma$  in response to GFAP<sub>264-272</sub> peptide and **(C)** are specifically stained with H2-D<sup>b</sup>:GFAP<sub>264-272</sub> tetramer following five days of in vitro culture. **(D)** GFAP<sub>264-272</sub>-reactive CD8 T cells are further expanded following 12 days in vitro culture. **(E)** CD8 T cells isolated from C57BL/6 mice infected with rAd-MOG produce IFN $\gamma$  in response to MOG<sub>81-88</sub> peptide and **(F)** are specifically stained with H2-K<sup>b</sup>:MOG<sub>81-88</sub> tetramer following five days of in vitro culture. **(D)** MOG<sub>81-88</sub>-reactive CD8 T cells are further expanded following 12 days in vitro culture. Shown are representative examples from at least five individual mice.

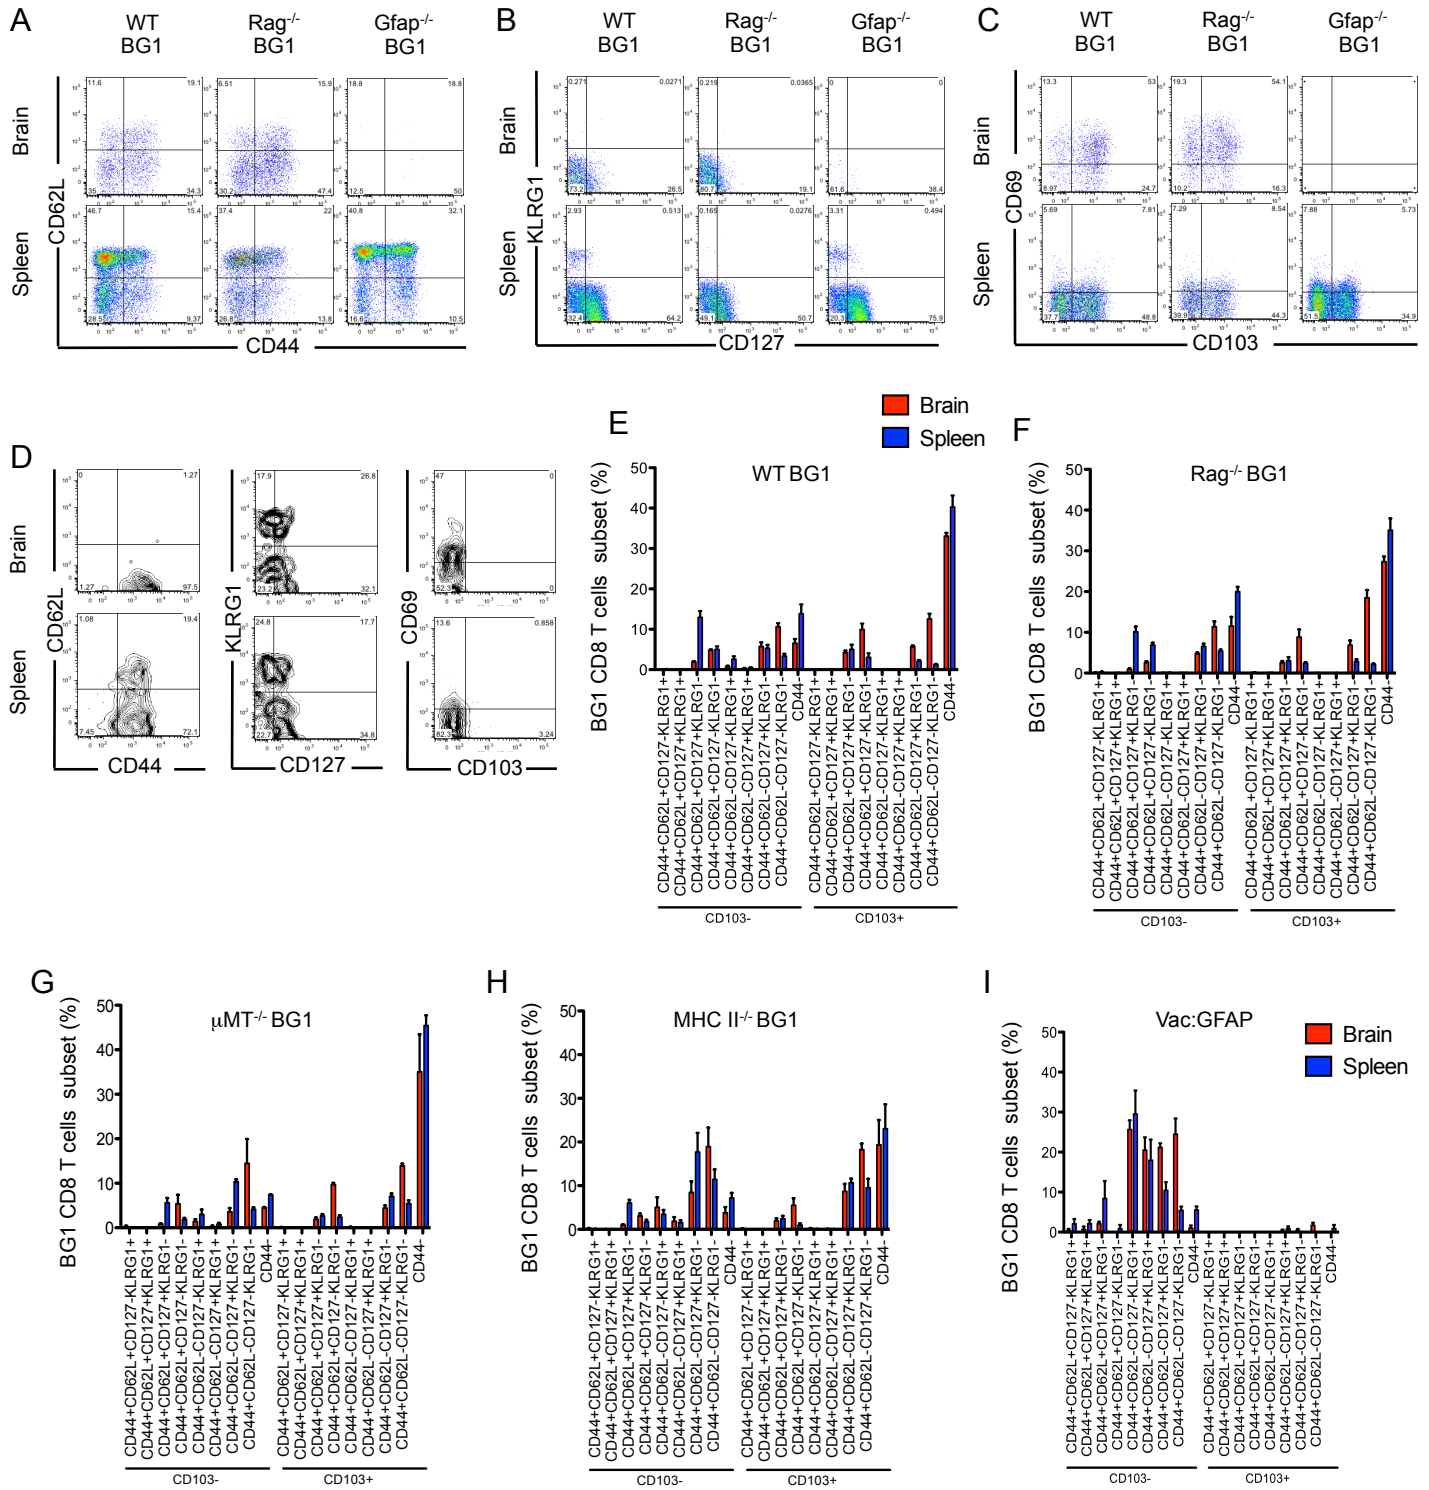

**Figure S2.** Identification of BG1 CD8 T cell subsets in the brain of BG1 mice and mice infected with Vac:GFAP. Brain and spleen tissue was isolated and analyzed by flow cytometry. Data are from six individual mice and shown as dot plots and bar graphs in **A-C**, **E-H** for spontaneous diseased mice, in **D** and **I** for Vac:GFAP-infected mice. Error bars represent SEM.

## **Supplemental Videos**

**Video S1.** BG1 mouse with spontaneous grade 9 atypical CNS disease symptoms.

**Video S2.** BG1 mouse with Vac-GFAP induced grade 8 atypical EAE disease symptoms.
